# Supplementary material for: Defective kinase activity of IKKα leads to combined immunodeficiency and disruption of immune tolerance in humans
Source: PubMed Central journal article supplement — Nat Commun. 2024 Nov 16;15:9944. doi: 10.1038/s41467-024-54345-4 (PMC11569180; doi:10.1038/s41467-024-54345-4), 2024-11-16
Supplement: 41467_2024_54345_MOESM1_ESM.pdf [file 41467_2024_54345_MOESM1_ESM.pdf]

## Supplementary Figures and Tables

### **Defective kinase activity of IKK $\alpha$ leads to combined immunodeficiency and disruption of immune tolerance in humans.**

Gökhan Cildir, Umran Aba, Damla Pehlivan, Denis Tvorogov, Nicholas I. Warnock, Canberk İpşir, Elif Arık, Chung Hoow Kok, Ceren Bozkurt, Sidem Tekeođlu, Gaye İnal, Mahmut Cesur, Ercan Küçükosmanođlu, İbrahim Karahan, Berna Savaş, Deniz Balci, Ayhan Yaman, Nazlı Deveci Demirbaş, İlhan Tezcan, Sule Haskologlu, Figen Dođu, Aydan İkinciöđulları, Ozlem Keskin\*, Damon J. Tumes\*, Baran Erman\*

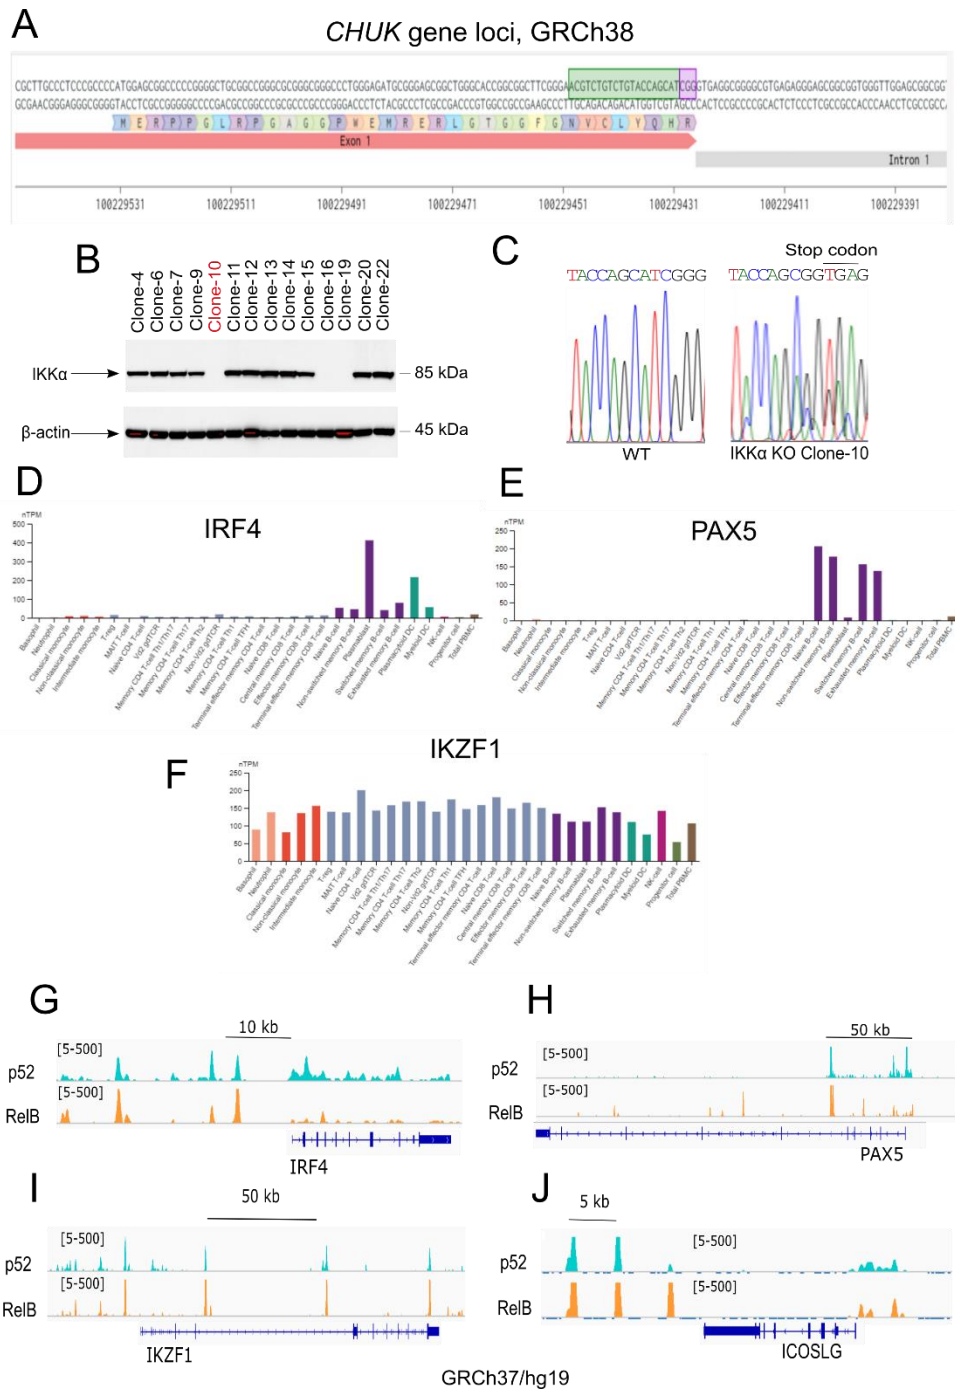

**Figure-S1: Editing of *CHUK* gene loci in HEK293T cells and analysis of RelB and p52 binding in the genomic loci of *IRF4*, *PAX5*, *IKZF1* and *ICOSLG* genes in human B cells.**

**A)** CRISPR/Cas9-mediated *CHUK* deletion strategy in HEK293T cells. A PAM sequence (5'-ACGTCTGTCTGTACCAGCAT-3') in Exon-1 of the *CHUK* gene, coding for IKK $\alpha$ , was selected for targeting. **B)** Western blotting results of IKK $\alpha$  in different clones of genome-edited HEK293T cells.  $\beta$ -actin was used as a loading control. **C)** Sanger sequencing results of genome-edited *CHUK* gene locus in WT HEK293T cells and IKK $\alpha$ -KO HEK293T cells (Clone-10). **D-F)** Expression levels of *IRF4*, *PAX5*, and *IKZF1* were analyzed in 29 blood cell types and total PBMCs from Monaco et al (Ref 58). The transcript expression values (nTPM) are visualized in the figure. **G-J)** p52 and RelB binding in *IRF4*, *PAX5*, *IKZF1* and *ICOSLG* gene loci was analysed using the Integrative Genomics Viewer (IGV). ChIP-seq datasets were extracted from a previously published study (GSE55105). Tracks are based on GRCh37/hg19 version of the human genome reference builds.

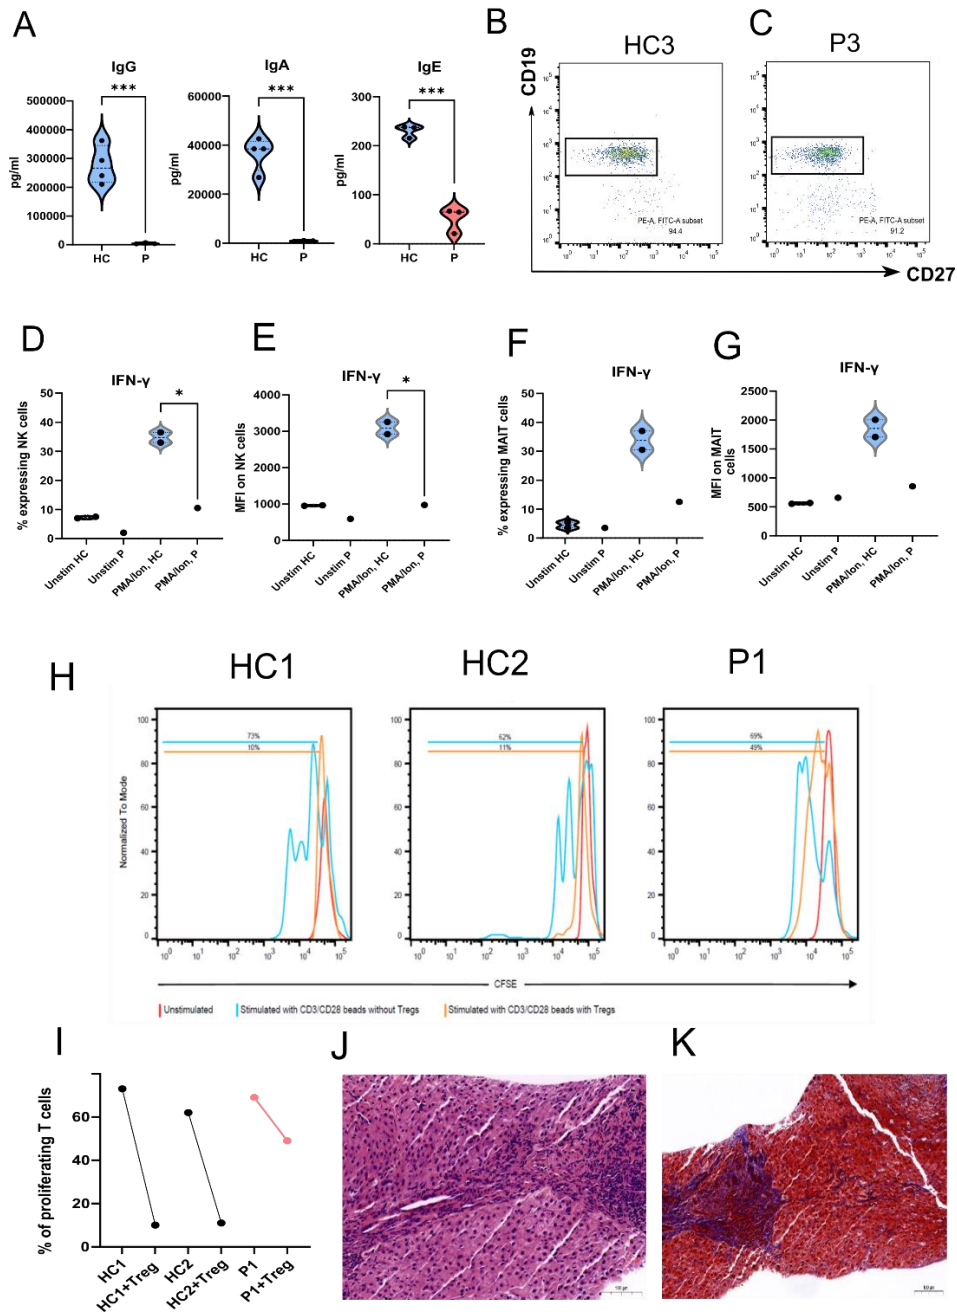

**Figure-S2: Analysis of B cell class switching in PBMC culture, IFN- $\gamma$  expression in NK and MAIT cells, Treg suppression assay and inflammation and fibrosis in liver biopsy sample of patient-1.**

**A)** In vitro class switching experiment using PBMCs of patients (n=3) and healthy controls (n=4) upon in vitro stimulation with recombinant CD40L and IL-4 for 7 days. IgG, IgA and IgE levels in culture supernatant were measured with multiplexed bead-based assay. Two-tailed, non-paired t-test was used for statistical analysis. **B-C)** Flow cytometric analysis of purified naïve B cells from a healthy control and patient sample using CD19 and CD27 markers. **D-G)** Flow cytometric analysis of intracellular IFN- $\gamma$  expression in NK and MAIT cells with or without stimulation with PMA and ionomycin. Results are from 2 healthy controls and 1 patient. One-way ANOVA was used for statistical analysis. **H)** Treg suppression assay results from 2 healthy controls and patient-1. **I)** Graphical representation of Treg suppression assay in H. **J)** H&E staining (x32) showing portal inflammation and prominent cholestasis around the periportal hepatocytes in liver biopsy sample of P1; scale bar, 100  $\mu$ m. **K)** Gomori Trichrome staining (x20) showing portal, periportal and perisinusoidal fibrosis in liver biopsy sample of P1.

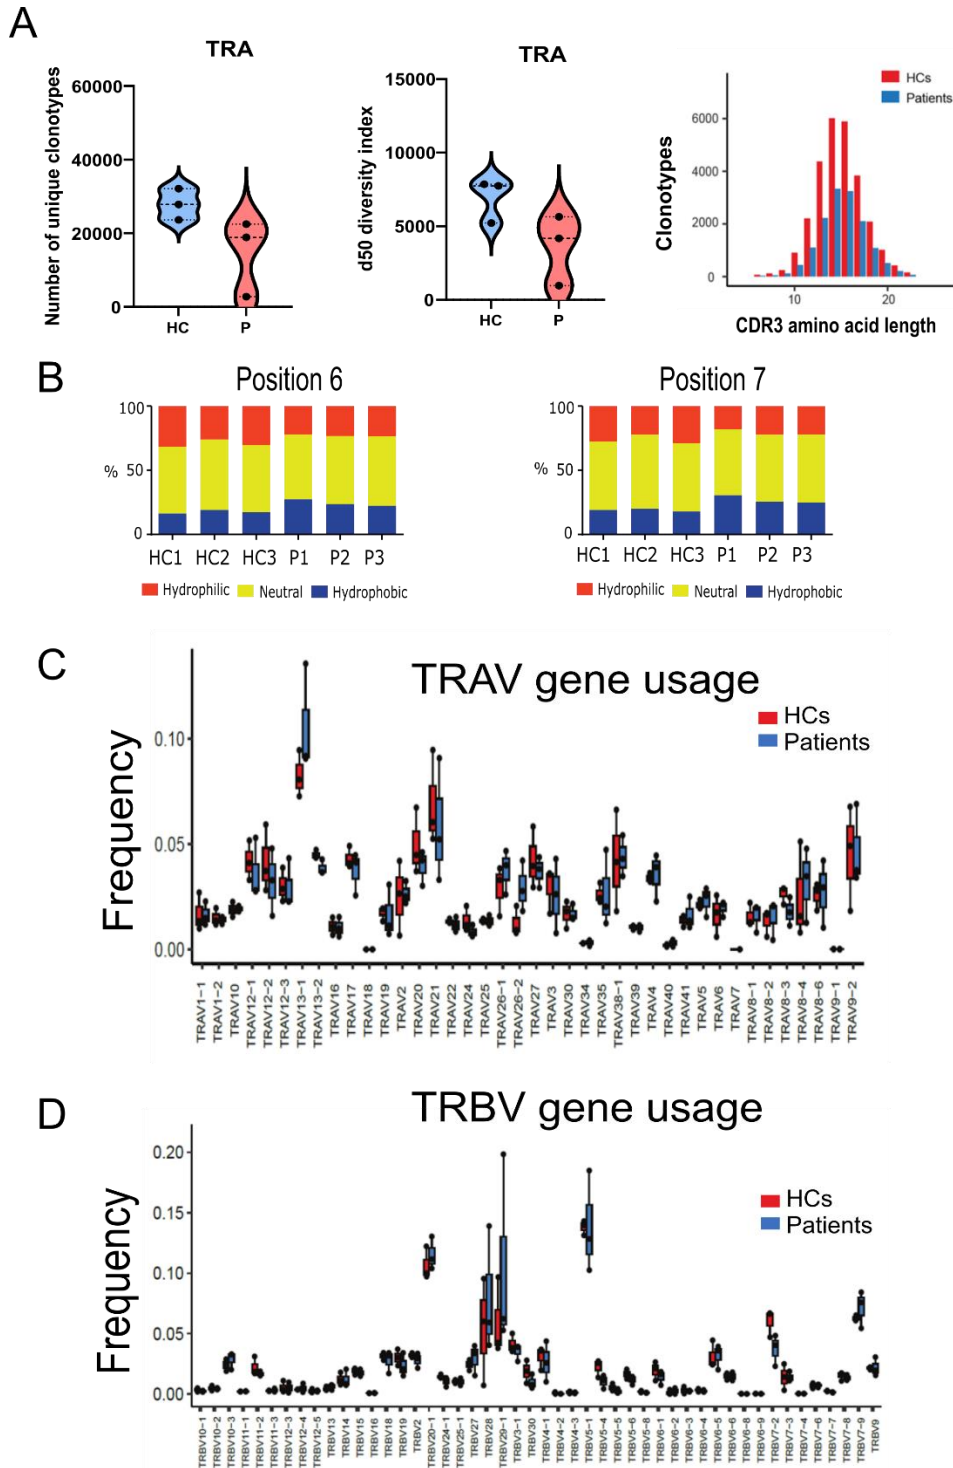

**Figure-S3: Gene usage analysis of TCR repertoire in patients and healthy controls.**

**A)** Number of unique clonotypes, d50 diversity index (number of clonotypes occupying the 50% of repertoires) and CDR3 amino acid length of TRA repertoire of healthy controls (n=3) and patients (n=3). Two-tailed, non-paired t-test was used for statistical analysis. **B)** Distribution of hydrophobic, neutral, and hydrophilic amino acids in positions 6 and 7 in TRB CDR3 region of healthy controls (n=3) and patients (n=3). **C)** TRAV gene usage comparison between patients (n=3) and healthy controls (n=3). Red bars indicate healthy controls and blue bars indicate  $IKK\alpha^{G167R}$  patients. **D)** TRBV gene usage comparison between patients (n=3) and healthy controls (n=3). Red bars indicate healthy controls and blue bars indicate  $IKK\alpha^{G167R}$  patients.

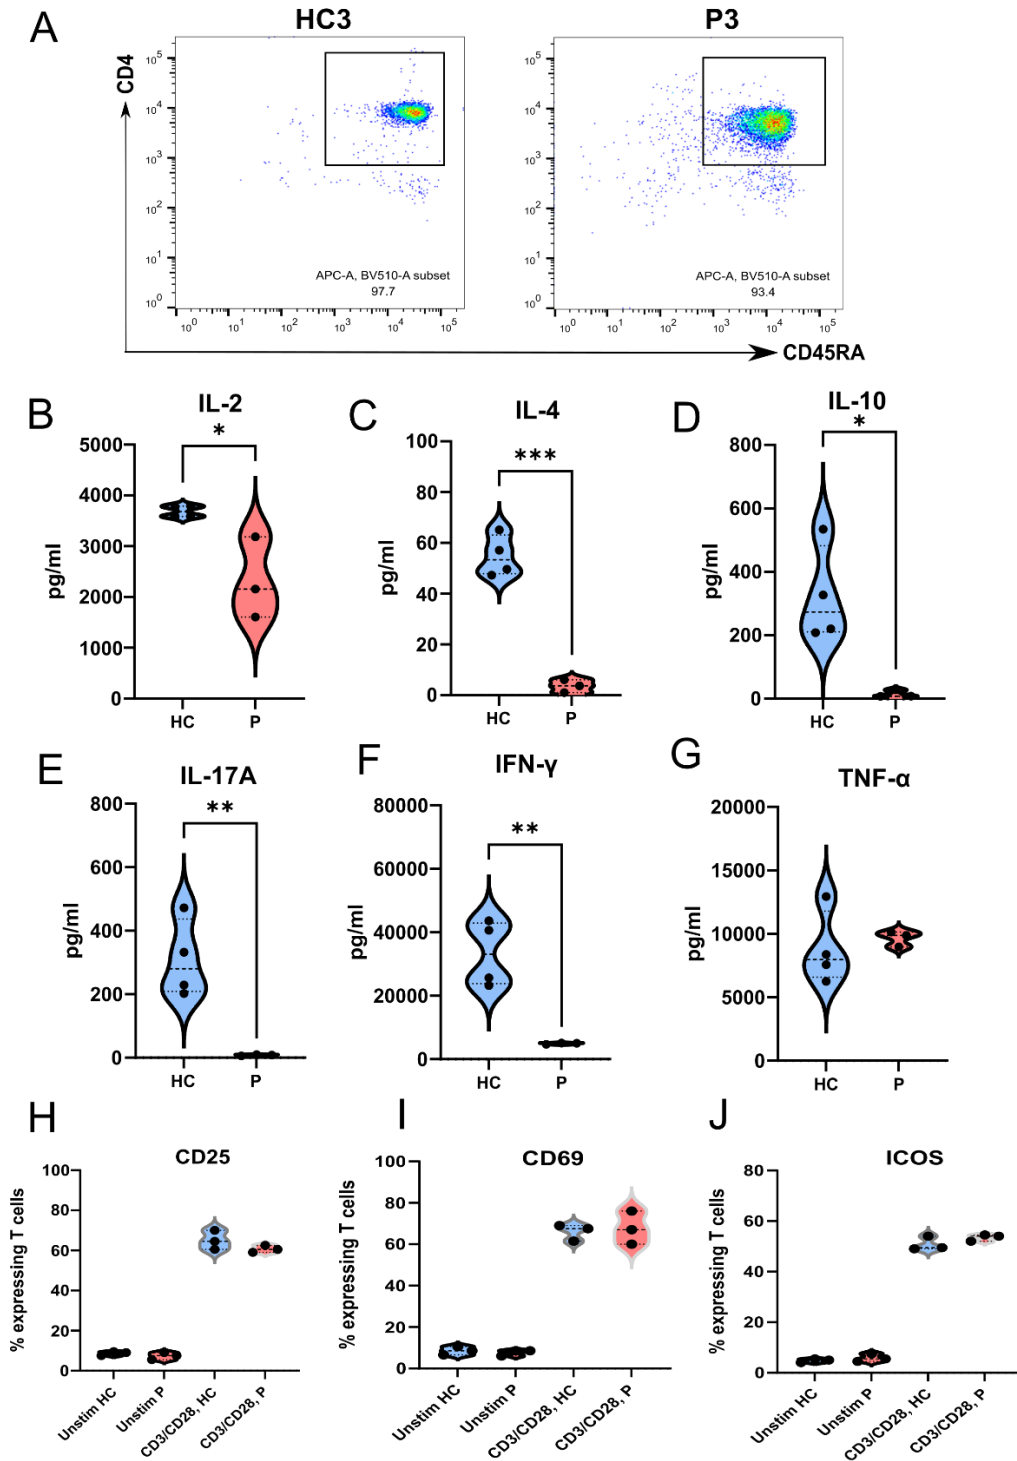

**Figure-S4: T cell activation and cytokine release in PBMC culture from patient cells and healthy controls.**

**A)** A representative flow cytometry staining of purified naïve CD4<sup>+</sup> CD45RA<sup>+</sup> T cells from a healthy control and patient sample. **B-G)** Analysis of the cytokine release from PBMCs 48 hours post stimulation with anti-CD3 and anti-CD28 antibodies (n=4 healthy controls vs n=3 patients). Two-tailed, non-paired t-test was used for statistical analysis. **H-J)** Flow cytometric analysis of the surface expression of CD25, CD69 and ICOS on T cells with or without stimulation of PBMCs with anti-CD3 and anti-CD28 antibodies in cell culture from healthy controls (n=3) and patients (n=3). One-way ANOVA was used for statistical analysis.

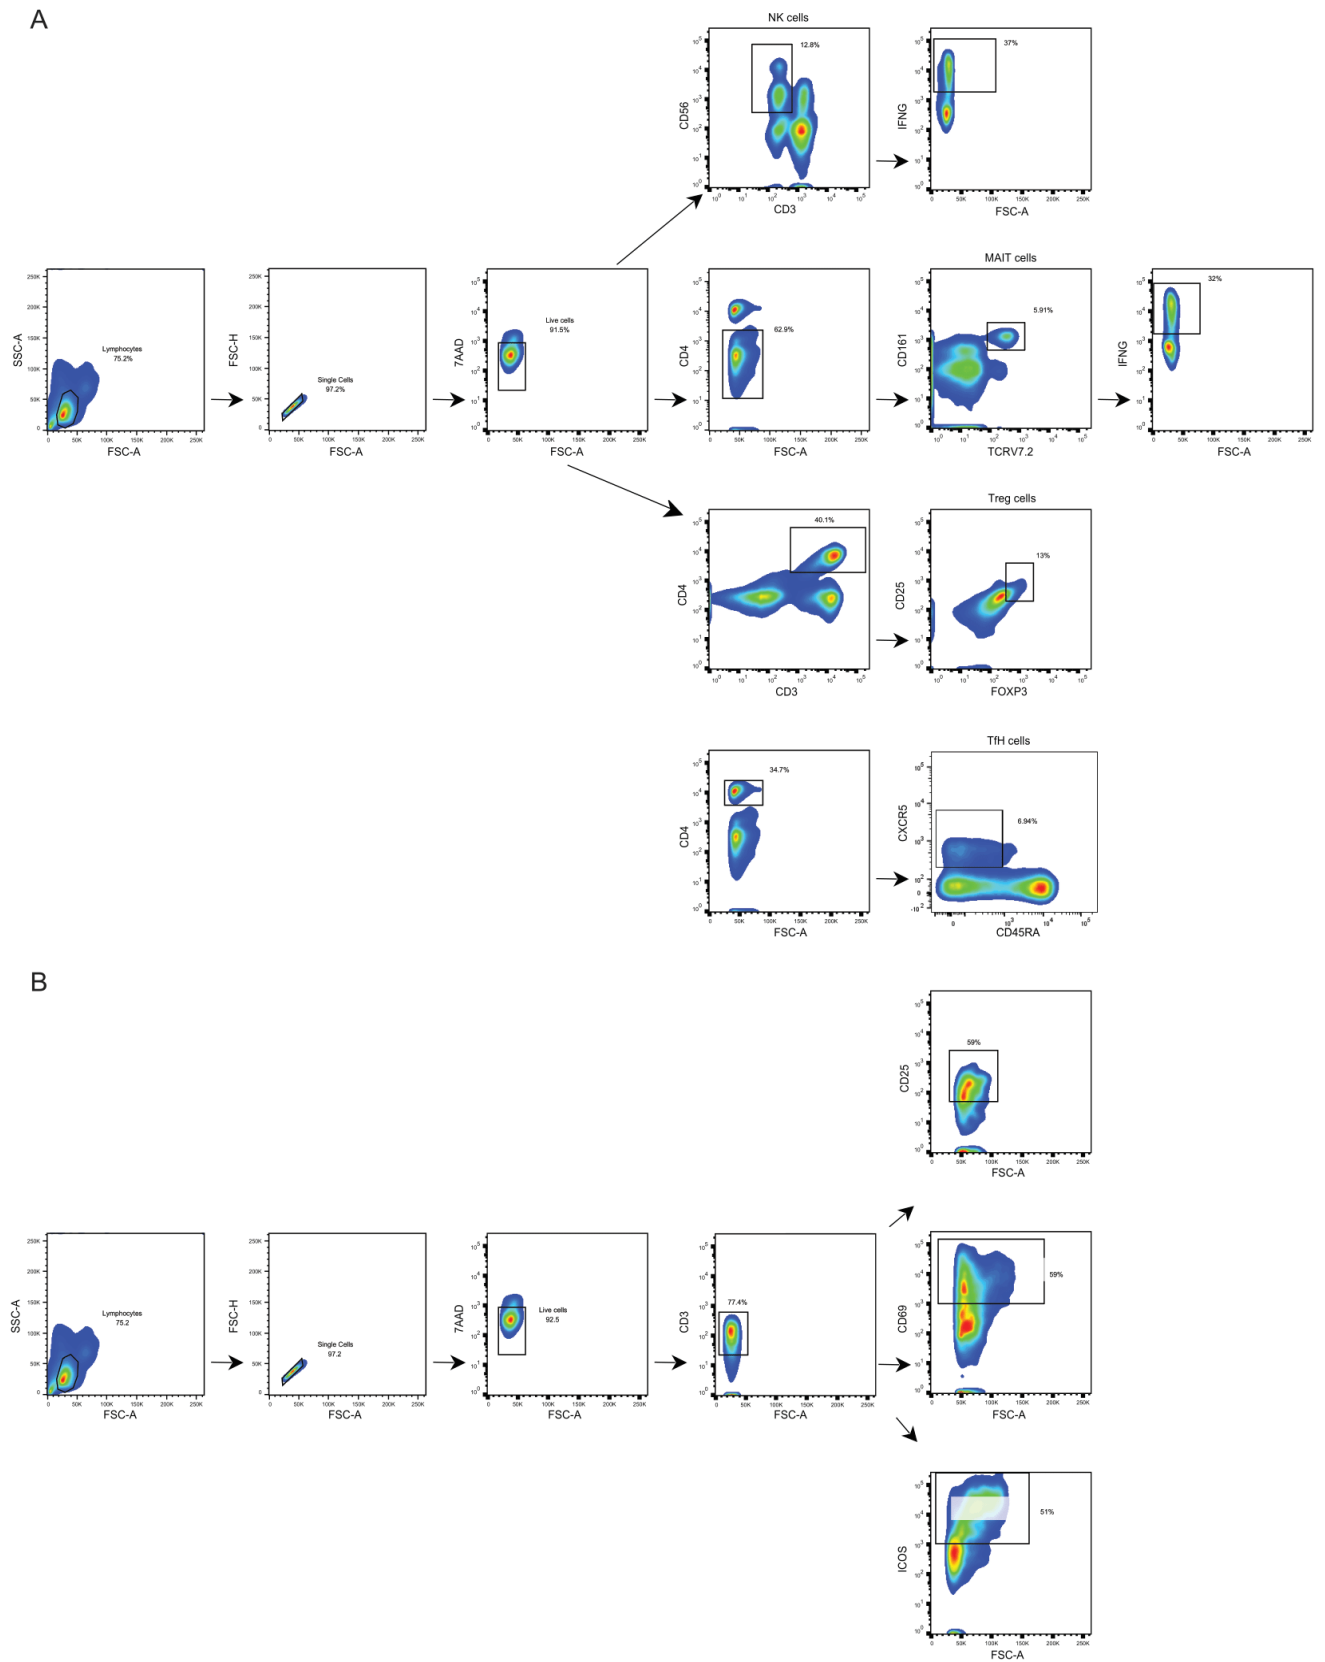

**Figure-S5:** Gating strategies used for T cell subgroups and NK cells. **A.** Gating strategies for the phenotyping of NK, MAIT, Treg and Tfh cells and intracellular staining of IFNG in stimulated NK and MAIT cells. **B.** Gating strategies of the activation markers on stimulated T cells.

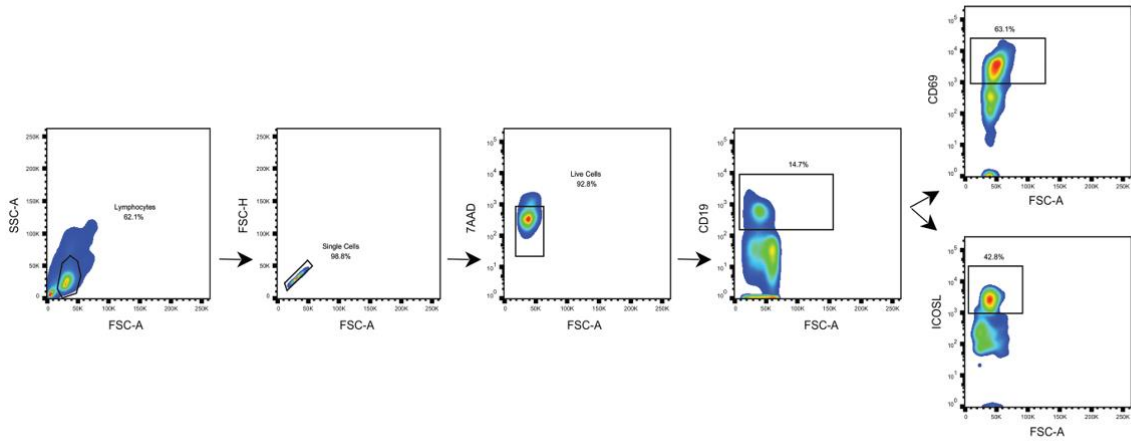

**Figure-S6:** Gating strategies of the activation markers on stimulated B cells.

## **Supplementary Table-1: Medical history of patients**

### **Patient-1**

The patient has been experiencing frequent lower and upper airway infections since the age of 6 months. Intestinal problems began in the first few months of life. At the age of 2, she was admitted to the child polyclinic due to recurring episodes of diarrhea and vomiting. She also had frequent coughing and expectoration. She experienced fever of unknown origin lasting 3-4 days, which was resolved with intravenous antibiotics. When she was 4 years old, she was diagnosed with bronchitis. She has shown a high susceptibility to infections and has been hospitalized for pneumonia on at least two occasions. For the past 6 months, she has been dealing with persistent oral candidiasis that has not improved. The patient has failure to thrive, as indicated by weight and height measurements at the age of 7 years and 3 months: weight: 15.2 kg (0.12 percentile) and height: 106 cm (0.04 percentile). To address her recurring diarrhea and difficulties with weight gain, she underwent a colonoscopy, which resulted in a preliminary diagnosis of inflammatory bowel disease. This diagnosis was later confirmed by the child gastroenterology service as colitis. She has exhibited poor dental hygiene and has experienced decay in her upper and lower molar teeth. She has been receiving intravenous immunoglobulin (IVIG) and prophylactic trimethoprim/sulfamethoxazole and fluconazole. The patient has presented with icterus, high bilirubin levels, and elevated cholesterol levels. Additionally, hepatosplenomegaly (+5 cm) and hepatic fibrosis were observed. A diagnosis of autoimmune liver disease was made, and a liver biopsy was conducted for further investigation. Inflammatory arthritis was also noted, with synovial thickening in both knees and the left hip joint.

### **Clinical history of patient-1 after liver transplantation**

In August 2023, the patient underwent a liver transplant from her father due to liver failure. At +1 month after the transplant, she developed mild CMV viremia, which was successfully treated with oral valganciclovir. However, 3.5 months after the liver transplantation, she developed cholangitis and required hospitalization at the transplantation centre. Intravenous antibiotic treatment was administered, and there was no significant decline in liver function during this period.

Two weeks after being discharged from the centre, she experienced fever, diarrhea, and vomiting. Due to her poor overall condition and lack of urine output, she was admitted to the hospital in her hometown. A hemogram revealed pancytopenia (WBC: 930/mm<sup>3</sup>, absolute neutrophil: 550/mm<sup>3</sup>, absolute lymphocyte: 310/mm<sup>3</sup>, Hb: 8g/dl, thrombocyte: 33,000/mm<sup>3</sup>). She also exhibited signs of renal failure, with elevated levels of creatine (6.8 mg/dl), urea (180 mg/dl), BUN (80 mg/dl), and low levels of potassium (K<sup>+</sup>: 2.7 mmol/L). Coagulation tests showed impairment (prothrombin time: 18.3 seconds and INR: 1.6), and her CRP was measured at 180 mg/dl.

She received broad-spectrum IV antibiotics, fluid support, and vitamin K. Tacrolimus was discontinued after reaching a level of 16 ng/mL. She was planned to be transferred to the paediatric intensive care unit at our hospital due to the need for haemodialysis. However, during a vomiting episode, she aspirated gastric contents, leading to severe respiratory distress



and requiring intubation. The patient experienced cardiac arrest and was resuscitated through cardiopulmonary resuscitation (CPR).

Upon admission to our paediatric intensive care unit, the patient presented with sepsis, hypothermia, hypotension, diffuse mucosal haemorrhages, and a Glasgow Coma Scale (GCS) score of 3. Blood gas analysis revealed a pH of 6.9, PCO<sub>2</sub> of 61 mmHg, PO<sub>2</sub> of 29 mmHg, and lactate level of 10 mmol/L. Treatment with meropenem, vancomycin, colistin, amphotericin B, and metronidazole was initiated. Adrenaline, noradrenaline, hydrocortisone, dopamine, and methylene blue supplements were administered. Fresh frozen plasma, vitamin K, tranexamic acid, and platelet transfusions were provided. Haemodialysis was performed once hemodynamic stability was achieved, resulting in significant decreases in creatinine, BUN, and urea levels.

Abdominal tomography revealed perfusion disorder in the transplanted liver parenchyma, dilatation, and diffuse wall contrast in the intrahepatic bile ducts. Hypodense regions consistent with multiple abscesses of varying sizes were observed, primarily located peripherally and near dilated bile ducts. No significant vascular pathology was detected.

Despite receiving all available treatments, including platelets, fresh frozen plasma, vitamin K, tranexamic acid, and factor 7, the bleeding from the mucosa could not be controlled. Unfortunately, the patient succumbed to progressive multiorgan failure and passed away on the third day of hospitalization.

### **Patient-2**

The patient has had frequent upper airway infections and recurrent bronchiolitis since she was 2 months old. She was first hospitalized at the age of 1 due to occasional episodes of diarrhea. In addition to the diarrhea, she experienced recurrent oral and perianal aphthous ulcers and abdominal pain. Due to her sister (referred to as patient 1) being diagnosed with Common Variable Immunodeficiency (CVID), the patient was identified early on for IVIG treatments. She has been receiving IVIG and prophylactic trimethoprim/sulfamethoxazole and fluconazole. Her weight is 13 kg, which falls within the 25th percentile, and her height is 93 cm, which falls between the 25th and 50th percentiles.

### **Patient-3**

The patient has been experiencing frequent episodes of diarrhea and bronchiolitis since birth. She has a high susceptibility to infections and has received treatment with antibiotics. At the age of 5 months, she was admitted to the Children's Hospital due to shortness of breath and was subsequently transferred to the intensive care unit (ICU) after being diagnosed with pneumonia. During her time in the ICU, a CT scan revealed that she had contracted COVID-19. Two months later, her immunoglobulin levels were found to be significantly low, leading to the initiation of IVIG treatment. However, over the past two months, she has continued to experience recurrent infections. There is no history of ear infections or oral candidiasis.

At the age of 3 years and 6 months, her weight is 13.65 kg, which falls within the 25th percentile, and her height is 92 cm, which falls between the 25th and 50th percentiles.

|                                                               | <b>Patient-1</b>                                                                                                                                                                                                                                                                                                                            | <b>Patient-2</b>                                                                                                                                                                            | <b>Patient-3</b>                   |
|---------------------------------------------------------------|---------------------------------------------------------------------------------------------------------------------------------------------------------------------------------------------------------------------------------------------------------------------------------------------------------------------------------------------|---------------------------------------------------------------------------------------------------------------------------------------------------------------------------------------------|------------------------------------|
| <b>Gender</b>                                                 | Female                                                                                                                                                                                                                                                                                                                                      | Female                                                                                                                                                                                      | Female                             |
| <b>Current age</b>                                            | Deceased at the age of 8.5 years old                                                                                                                                                                                                                                                                                                        | Under 9 years old                                                                                                                                                                           | Under 9 years old                  |
| <b>Age at onset of symptoms</b>                               | 6 months                                                                                                                                                                                                                                                                                                                                    | 2 months                                                                                                                                                                                    | Since birth                        |
| <b>Age at CVID diagnosis</b>                                  | 4 years old                                                                                                                                                                                                                                                                                                                                 | 1 year old                                                                                                                                                                                  | 1 year old                         |
| <b>Consanguinity</b>                                          | Yes                                                                                                                                                                                                                                                                                                                                         | Yes                                                                                                                                                                                         | Yes                                |
| <b>Clinical features</b>                                      |                                                                                                                                                                                                                                                                                                                                             |                                                                                                                                                                                             |                                    |
| <b>Infections</b>                                             |                                                                                                                                                                                                                                                                                                                                             |                                                                                                                                                                                             |                                    |
| <b>Microorganisms detected at several infectious episodes</b> | <ul style="list-style-type: none"> <li>- Infections with rotavirus, SARS-CoV-2 (twice, with a 10-month interval)</li> <li>-Haemophilus influenzae, Bocavirus, and Rhinovirus positive in nasopharyngeal swabs.</li> <li>-Oral and oesophageal candidiasis</li> <li>-Candida positive in stool.</li> <li>-CMV positive in plasma.</li> </ul> | <ul style="list-style-type: none"> <li>-Haemophilus influenzae, and adenovirus positive in nasopharyngeal swabs.</li> <li>-Salmonella gastroenteritis</li> <li>-Oral candidiasis</li> </ul> | -SARS-CoV-2                        |
| <b>Autoimmunity</b>                                           | Yes                                                                                                                                                                                                                                                                                                                                         | Unknown                                                                                                                                                                                     | Unknown                            |
| <b>Secondary lymphoid organs</b>                              | No tonsils or palpable lymph nodes                                                                                                                                                                                                                                                                                                          | No tonsils or palpable lymph nodes                                                                                                                                                          | No tonsils or palpable lymph nodes |
| <b>Hepatosplenomegaly</b>                                     | Yes                                                                                                                                                                                                                                                                                                                                         | No                                                                                                                                                                                          | Yes                                |
| <b>Allergies</b>                                              | Not detected by skin prick test                                                                                                                                                                                                                                                                                                             | Not detected by skin prick test                                                                                                                                                             | Not detected by skin prick test    |
| <b>Hepatic dysfunction</b>                                    | Yes                                                                                                                                                                                                                                                                                                                                         | Yes                                                                                                                                                                                         | Yes                                |
| <b>Liver failure</b>                                          | Yes                                                                                                                                                                                                                                                                                                                                         | No                                                                                                                                                                                          | No                                 |
| <b>Liver transplantation</b>                                  | Yes                                                                                                                                                                                                                                                                                                                                         | No                                                                                                                                                                                          | No                                 |
| <b>Outcome</b>                                                | Deceased                                                                                                                                                                                                                                                                                                                                    | Alive, receiving IVIG treatment                                                                                                                                                             | Alive, receiving IVIG treatment    |

**Supplementary Table-2: Test results of patients**

**Patient-1**

**Complete blood count**

| Test name                                                | Result (14/03/23) | Previous results (31/01/23) | Previous results (29/01/23) | Previous results (28/01/23) | Previous results (6/12/22) | Reference range |
|----------------------------------------------------------|-------------------|-----------------------------|-----------------------------|-----------------------------|----------------------------|-----------------|
| Leukocyte (WBC) x10 <sup>9</sup> /L                      | 8.03              | 6.36                        | 5.84                        | 5.2                         | 11.54                      | 5-13.5          |
| Erythrocyte (RBC) x10 <sup>12</sup> /L                   | <b>*3.38</b>      | 3.26                        | 3.12                        | 3.03                        | 3.55                       | 4-5.3           |
| Thrombocyte (PLT) x10 <sup>9</sup> /L                    | <b>*604</b>       | 326                         | 281                         | 284                         | 532                        | 150-450         |
| Haemoglobin (Hb) (g/dL)                                  | <b>*8.7</b>       | <b>8.3</b>                  | <b>7.9</b>                  | <b>7.8</b>                  | <b>8.5</b>                 | 11.5-15         |
| Haematocrit (%)                                          | <b>*29.2</b>      | <b>29</b>                   | <b>27.5</b>                 | <b>26.4</b>                 | <b>31</b>                  | 34-45           |
| Mean corpuscular volume (MCV) (fL)                       | 86.4              | 89                          | 88.1                        | 87                          | 87.3                       | 76-91           |
| Mean corpuscular haemoglobin (MCH) (pg/cell)             | <b>*25.7</b>      | <b>25.5</b>                 | <b>25.3</b>                 | <b>25.7</b>                 | <b>23.9</b>                | 26-31           |
| Mean corpuscular haemoglobin concentration (MCHC) (g/dL) | <b>*29.8</b>      | <b>28.6</b>                 | <b>28.7</b>                 | <b>29.5</b>                 | <b>27.4</b>                | 33-35.7         |
| Red Cell Distribution Width (RDW) (%)                    | <b>*19.4</b>      | <b>20.1</b>                 | <b>19</b>                   | <b>18.6</b>                 | <b>18.9</b>                | 11.5-14.5       |
| Neutrophil (%)                                           | <b>*34.8</b>      | 40.8                        | 46.2                        | 49                          | 56.8                       | 35-65           |
| Lymphocyte (%)                                           | 44.8              | 42.6                        | 40.6                        | 37.9                        | 33.8                       | 30-55           |
| Monocyte (%)                                             | <b>*13</b>        | 7.9                         | 6.5                         | 7.7                         | 4.7                        | 2-9             |
| Eosinophil (%)                                           | <b>*6.2</b>       | 7.9                         | 5.8                         | 4.6                         | 4.0                        | 0-6             |
| Basophil (%)                                             | 1.2               | 0.8                         | 0.9                         | 0.8                         | 0.7                        | 0-1.5           |
| Neutrophil count x10 <sup>9</sup> /L                     | 2.79              | 2.6                         | 2.7                         | 2.55                        | 6.56                       | 1.5-8.0         |
| Lymphocyte count x10 <sup>9</sup> /L                     | 3.6               | 2.71                        | 2.37                        | 1.97                        | 3.9                        | 1.5-7           |

|                                      |              |      |      |      |      |          |
|--------------------------------------|--------------|------|------|------|------|----------|
| Monocyte count x10 <sup>9</sup> /L   | <b>*1.04</b> | 0.5  | 0.38 | 0.4  | 0.54 | 0.3-1    |
| Eosinophil count x10 <sup>9</sup> /L | 0.5          | 0.5  | 0.34 | 0.24 | 0.46 | 0-0.7    |
| Basophil count x10 <sup>9</sup> /L   | 0.1          | 0.05 | 0.05 | 0.04 | 0.08 | 0-0.2    |
| Mean platelet volume (MPV) fL        | 11.5         | 11.8 | 12.2 | 12   | 11.7 | 9.2-12.1 |
| Neutrophil to lymphocyte ratio (NLR) | 0.76         | 0.96 | 1.14 | 1.29 | 1.61 |          |

### Immunoglobulins

| Sample | Antibody (before IVIG) | Result            | Reference  |
|--------|------------------------|-------------------|------------|
| Serum  | IgA (g/L)              | <b>&lt;0.0667</b> | 0.34-1.81  |
| Serum  | IgM (g/L)              | <b>0.03</b>       | 0.42-1.81  |
| Serum  | IgG (g/L)              | <b>0.192</b>      | 5.01-14.59 |

| Sample | Test name                              | Result        | Previous results (31/01/23) | Previous results (28/01/23) | Previous results (27/01/23) | Previous results (6/12/22) | Reference range |
|--------|----------------------------------------|---------------|-----------------------------|-----------------------------|-----------------------------|----------------------------|-----------------|
| Serum  | Direct bilirubin (mg/dL)               | <b>*12.91</b> | 12.24                       | 10.10                       | 11.86                       | 8.09                       | 0-0.3           |
| Serum  | Total bilirubin (mg/dL)                | <b>*13.98</b> | 12.50                       | 12.70                       | 12.37                       | 8.11                       | 0.1-1.2         |
| Serum  | Indirect bilirubin (mg/dL)             | <b>*1.07</b>  | 0.26                        | 2.6                         | 0.51                        | 0.02                       | 0-1             |
| Serum  | Aspartate aminotransferase (AST) (U/L) | <b>*324</b>   | 225                         | 281                         | 274                         | 244                        | 0-35            |
| Serum  | Alanine aminotransferase (ALT) (U/L)   | <b>*160</b>   | 173                         | 208                         | 212                         | 167                        | 0-35            |
| Serum  | Alkaline phosphatase (U/L)             | <b>*1861</b>  | 1538                        | 1658                        | 1578                        | 1773                       | 142-335         |
| Serum  | Gamma-glutamyl transferase (GGT) (U/L) | <b>*563</b>   | 386                         | 418                         | 395                         | 587                        | 6-42            |
| Serum  | Lactate dehydrogenase (U/L)            | <b>*373</b>   | 323                         | 335                         | 323                         | 425                        | 120-300         |
| Serum  | CRP (mg/L)                             | <b>*31.9</b>  | 21.8                        | 24.4                        | 17.5                        | 18.3                       | 0-5             |

## Coagulation tests

| Test name                                              | Result       | Previous results<br>(31/01/23) | Previous results<br>(28/01/23) | Previous results<br>(27/01/23) | Reference range |
|--------------------------------------------------------|--------------|--------------------------------|--------------------------------|--------------------------------|-----------------|
| Prothrombin time (seconds)                             | <b>*17.2</b> | 13.2                           | 13.1                           | 12.6                           | 9.4-12.5        |
| INR                                                    | <b>*1.53</b> | 1.15                           | 1.14                           | 1.1                            | 0.83-1.11       |
| Activated partial thromboplastin time (APTT) (seconds) | <b>*43.6</b> | 35.1                           | 35.4                           | 35.9                           | 25.1-36.5       |
| D-dimer (ng/ml)                                        | 120          | N. A                           | N. A                           | 112                            | 0-243           |
| Fibrinogen (g/l)                                       | <b>*6.98</b> | N. A                           | <b>6.57</b>                    | <b>6.21</b>                    | 2-3.93          |

## Lipid profile

| Test name                   | Result         | Previous results<br>(31/01/23) | Previous results<br>(08/12/22) | Previous results<br>(07/12/22) | Reference range |
|-----------------------------|----------------|--------------------------------|--------------------------------|--------------------------------|-----------------|
| Triglyceride (mg/dL)        | <b>*501</b>    | 155                            | 401                            | 426                            | 0-150           |
| VLDL Cholesterol (mg/dL)    | Not calculated | Not calculated                 | Not calculated                 | Not calculated                 | 0-30            |
| HDL Cholesterol (mg/dL)     | <b>*12</b>     | 17                             | 9                              | 9                              | 40-60           |
| Total cholesterol (mg/dL)   | <b>485</b>     | <b>461</b>                     | <b>687</b>                     | <b>775</b>                     | <200 is ideal   |
| LDL cholesterol (mg/dL)     | 68             | 413                            | 101                            | 108                            | <130 is ideal   |
| Non-HDL Cholesterol (mg/dL) | <b>473</b>     | <b>444</b>                     | <b>678</b>                     | <b>766</b>                     | <130 is ideal   |

## Urine tests

| Test name          | Result    | Unit   | Reference range | Previous results<br>(06/12/22) |
|--------------------|-----------|--------|-----------------|--------------------------------|
| pH                 | 6.5       |        | 5-8             | 6                              |
| Protein            | Negative  | mg/dL  | 0-15            | Negative                       |
| Glucose            | Negative  | mg/dL  | 0-100           | Negative                       |
| Ketone             | Negative  | mg/dL  | 0-5             | Negative                       |
| Bilirubin          | <b>*3</b> | mg/dL  | 0-1             | <b>3</b>                       |
| Blood              | Negative  | e/μl   | 0-10            | Negative                       |
| Nitrite            | Negative  |        |                 | Negative                       |
| Urobilinogen       | Normal    | mg/dL  | 0-2             | Normal                         |
| Leukocyte esterase | Negative  | Leu/μl | 0-15            | Negative                       |

| Sample | Test name                  | Result                | Unit    | Previous results (16/03/23) | Previous results (31/01/23) | Previous results (25/01/23) |
|--------|----------------------------|-----------------------|---------|-----------------------------|-----------------------------|-----------------------------|
| Plasma | EBV qPCR                   | Negative              | copy/ml | Negative                    | Negative                    | Negative                    |
| Plasma | CMV DNA PCR (quantitative) | <b>1000, positive</b> | copy/ml | <b>796, positive</b>        | <b>200, positive</b>        | Negative                    |

### Specific proteins

| Sample | Test                      | Result        | Reference |
|--------|---------------------------|---------------|-----------|
| Serum  | Alpha-1 antitrypsin (g/L) | <b>*2.42</b>  | 1.02-1.57 |
| Serum  | Ceruloplasmin (g/L)       | <b>*0.864</b> | 0.23-0.48 |

### Patient-2

### Complete blood count

| Test name                                                | Result        | Previous results (14/03/23) | Previous results (22/08/22) | Previous results (26/10/21) | Reference range |
|----------------------------------------------------------|---------------|-----------------------------|-----------------------------|-----------------------------|-----------------|
| Leukocyte (WBC) x10 <sup>9</sup> /L                      | <b>*20,52</b> | 13.45                       | 13.05                       | <b>*18.16</b>               | 5-14.5          |
| Erythrocyte (RBC) x10 <sup>12</sup> /L                   | 4.93          | 4.78                        | 4.98                        | 4.4                         | 4-5             |
| Thrombocyte (PLT) x10 <sup>9</sup> /L                    | <b>*458</b>   | <b>*493</b>                 | 355                         | <b>*485</b>                 | 150-450         |
| Haemoglobin (Hb) (g/dL)                                  | <b>*8.7</b>   | <b>*8.3</b>                 | <b>*8.6</b>                 | <b>*9.4</b>                 | 11-14           |
| Haematocrit (%)                                          | 33.5          | <b>*30</b>                  | <b>*30.7</b>                | <b>*30.6</b>                | 33-41           |
| Mean corpuscular volume (MCV) (fL)                       | <b>*68</b>    | <b>*62.5</b>                | <b>*61.6</b>                | <b>*69.5</b>                | 76-91           |
| Mean corpuscular haemoglobin (MCH) (pg/cell)             | <b>*17.6</b>  | <b>*17.4</b>                | <b>*17.3</b>                | <b>*21.4</b>                | 24.5-30         |
| Mean corpuscular haemoglobin concentration (MCHC) (g/dL) | <b>*26</b>    | <b>*27.5</b>                | <b>*28</b>                  | <b>*30.7</b>                | 32.5-35.5       |
| Red Cell Distribution                                    | <b>*20.3</b>  | <b>*19.5</b>                | <b>*19.2</b>                | <b>*20.2</b>                | 11.5-14.5       |

|                                      |              |              |              |              |          |
|--------------------------------------|--------------|--------------|--------------|--------------|----------|
| Width (RDW) (%)                      |              |              |              |              |          |
| Neutrophil (%)                       | 42.5         | 29.3         | 29.1         | 33.3         | 30-60    |
| Lymphocyte (%)                       | 48.2         | 60.7         | 61.8         | 54.6         | 40-70    |
| Monocyte (%)                         | 7.7          | 8.1          | 5.9          | 10.2         | 2-10     |
| Eosinophil (%)                       | 1.2          | 1.6          | 2.9          | 1.7          | 0-6      |
| Basophil (%)                         | 0.4          | 0.3          | 0.3          | 0.2          | 0-1.5    |
| Neutrophil count x10 <sup>9</sup> /L | <b>*8.7</b>  | 3.94         | 3.79         | 6.06         | 1.5-8.0  |
| Lymphocyte count x10 <sup>9</sup> /L | <b>*9.9</b>  | <b>*8.16</b> | <b>*8.07</b> | <b>*9.91</b> | 2-8      |
| Monocyte count x10 <sup>9</sup> /L   | <b>*1.59</b> | <b>*1.09</b> | 0.77         | *1.85        | 0.3-1    |
| Eosinophil count x10 <sup>9</sup> /L | 0.23         | 0.22         | 0.38         | 0.3          | 0-0.7    |
| Basophil count x10 <sup>9</sup> /L   | 0.09         | 0.04         | 0.04         | 0.04         | 0-0.2    |
| Mean platelet volume (MPV) fL        | 10.2         | 9.9          | 9.9          | 9.9          | 9.2-12.1 |
| Neutrophil to lymphocyte ratio (NLR) | 0.88         | 0.48         | -            | -            |          |

### Immunoglobulins

| Sample | Antibody    | Results (Before IVIG) | Reference |
|--------|-------------|-----------------------|-----------|
| Serum  | IgA (g/L)   | <0.6                  | 0.34-1.81 |
| Serum  | IgM (g/L)   | <b>*0.1</b>           | 0.42-1.81 |
| Serum  | IgG (g/L)   | <b>*0.3</b>           | 7-16      |
| Serum  | IgE (IU/mL) | 10.1                  | 0-100     |

| Sample | Test name                  | Result (15/03/23) | Previous results (14/03/23) | Reference range |
|--------|----------------------------|-------------------|-----------------------------|-----------------|
| Serum  | Direct bilirubin (mg/dL)   | -                 | 0.06                        | 0-0.3           |
| Serum  | Total bilirubin (mg/dL)    | <b>* 0,05</b>     | 0.11                        | 0.1-1.2         |
| Serum  | Indirect bilirubin (mg/dL) |                   | 0.05                        | 0-1             |

|       |                                        |             |             |         |
|-------|----------------------------------------|-------------|-------------|---------|
| Serum | Aspartate aminotransferase (AST) (U/L) | 33          | 30          | 0-35    |
| Serum | Alanine aminotransferase (ALT) (U/L)   | 12          | 13          | 0-35    |
| Serum | Alkaline phosphatase (U/L)             | 182         | 181         | 142-335 |
| Serum | Gamma-glutamyl transferase (GGT) (U/L) | 7           | 7           | 6-42    |
| Serum | Lactate dehydrogenase (U/L)            | <b>*361</b> | <b>*311</b> | 120-300 |
| Serum | CRP (mg/L)                             | 0.7         | 0.8         | 0-5     |

### Patient-3

#### Complete blood count

| Test name                                              | Result        | Reference range |
|--------------------------------------------------------|---------------|-----------------|
| Leukocyte (WBC) x10 <sup>9</sup> /L                    | <b>*13.89</b> | 3.39 – 8.86     |
| Erythrocyte (RBC) x10 <sup>12</sup> /L                 | 4.08          | 4-5             |
| Thrombocyte (PLT) x10 <sup>9</sup> /L                  | <b>*486</b>   | 158 - 374       |
| Haemoglobin (Hb) g/dL                                  | <b>*10.9</b>  | 11.1 – 14.7     |
| Haematocrit (%)                                        | <b>*33.8</b>  | 36.9 – 49.1     |
| Mean corpuscular volume (MCV) fL                       | <b>* 82.8</b> | 87 – 102.2      |
| Mean corpuscular haemoglobin (MCH) pg/cell             | 26.7          | 25.6 – 30.8     |
| Mean corpuscular haemoglobin concentration (MCHC) g/dL | 32.2          | 32.2 – 35.5     |



|                                      |               |           |
|--------------------------------------|---------------|-----------|
| Red Cell Distribution Width (RDW)    | <b>*14.10</b> | 11.2 - 14 |
| Neutrophil %                         | <b>*28.10</b> | 30-60     |
| Lymphocyte %                         | 63.70         | 40-70     |
| Monocyte %                           | 6.30          | 2-10      |
| Eosinophil %                         | 1.4           | 0-6       |
| Basophil %                           | 0.5           | 0-1.5     |
| Neutrophil count x10 <sup>9</sup> /L | 3.90          | 1.5-8.0   |
| Lymphocyte count x10 <sup>9</sup> /L | <b>*8.85</b>  | 2-8       |
| Monocyte count x10 <sup>9</sup> /L   | 0.88          | 0.3-1     |
| Eosinophil count x10 <sup>9</sup> /L | 0.19          | 0-0.7     |
| Basophil count x10 <sup>9</sup> /L   | 0.07          | 0-0.2     |
| Mean platelet volume (MPV) fL        | <b>*9.1</b>   | 9.2-12.1  |

### Immunoglobulins

| Sample | Antibody | Result (Before IVIG) | Reference   | Unit  |
|--------|----------|----------------------|-------------|-------|
| Serum  | IgA      | <b>*0.1</b>          | 0.19 – 2.20 | g/L   |
| Serum  | IgM      | <b>*0.1</b>          | 0.4-1.4     | g/L   |
| Serum  | IgG      | <b>*5.6</b>          | 7-16        | g/L   |
| Serum  | IgE      | 12.2                 | 0-100       | IU/mL |

**Supplementary Table-3: Possible disease-causing variants identified by WES (minor allele frequency  $\leq 0.01$ )**

| Gene         | Chr | Variant                   | Zygosity | Consequence      | CADD | PolyPhen             | SIFT        |
|--------------|-----|---------------------------|----------|------------------|------|----------------------|-------------|
|              |     |                           |          | <b>P1 and P2</b> |      |                      |             |
| <b>CHUK</b>  | 10  | c.499G>A<br>p.Gly167Arg   | Hom      | Missense         | 28.5 | Possible<br>damaging | Deleterious |
| <b>TREX1</b> | 3   | c.341G>A<br>p.Arg114Hi    | Het      | Missense         | 18   | Possible<br>damaging | Deleterious |
| <b>CFTR</b>  | 7   | c.3659C>T<br>p.Thr1220Ile | Het      | Missense         | 10   | Benign               | Tolerated   |
| <b>POLE</b>  | 12  | c.232T>G<br>p.Leu78Val    | Het      | Missense         | 16.4 | Benign               | Tolerated   |
|              |     |                           |          | <b>P3</b>        |      |                      |             |
| <b>CHUK</b>  | 10  | c.499G>A<br>p.Gly167Arg   | Hom      | Missense         | 28.5 | Possible<br>damaging | Deleterious |
| <b>BRCA2</b> | 13  | c.800G>A<br>p.Gly267Glu   | Hom      | Missense         | 13   | Possible<br>damaging | Tolerated   |
| <b>KMT2D</b> | 12  | c.14267A>G<br>p.Lys4756Ar | Het      | Missense         | 22   | Benign               | Tolerated   |

**Supplementary Table-4: Detailed analysis of IKK $\alpha$ <sup>G167R</sup> by Missense 3D**

| <b>Type</b>                          | <b>Analysis</b>                                                                                                                                                                                                        | <b>Criterion</b>                                                                                                                 |
|--------------------------------------|------------------------------------------------------------------------------------------------------------------------------------------------------------------------------------------------------------------------|----------------------------------------------------------------------------------------------------------------------------------|
| <b>Disulphide breakage</b>           | The wild-type residue is not CYS so it cannot form a disulphide bond                                                                                                                                                   | The substitution breaks a disulphide bond that was in the wild type. The maximum S-S length for the bond is 3.3 Å                |
| <b>Buried Pro introduced</b>         | This substitution does not introduce a proline                                                                                                                                                                         | The substitution introduces a buried proline.                                                                                    |
| <b>Clash</b>                         | This substitution does not trigger clash alert. The local clash score for wild type is 69.50 and the local clash score for mutant is 71.29.                                                                            | The mutant structure has a MolProbity clash score $\geq 30$ and the increase in clash score is $> 18$ compared to the wild type. |
| <b>Buried hydrophilic introduced</b> | This substitution does not replace a buried hydrophobic residue with a hydrophilic residue. The wild-type residue GLY is exposed neutral with RSA 20.2% and the mutant residue ARG is buried hydrophilic with RSA 8.0% | The substitution replaces a buried hydrophobic residue with a hydrophilic residue.                                               |
| <b>Buried charge introduced</b>      | This substitution does not trigger buried uncharged residue alert. The wild-type residue GLY is exposed uncharged with RSA 20.2% and the mutant residue ARG is buried charged with RSA 8.0%                            | The substitution replaces a buried uncharged residue with a charged residue.                                                     |
| <b>Secondary structure altered</b>   | This substitution does not alter the secondary structure 'S' (bend)).                                                                                                                                                  | A substitution results in a change in the DSSP secondary structure assignment at the variant position.                           |
| <b>Buried charge switch</b>          | This substitution does not trigger buried charge switch alert. The wild-type residue GLY is exposed uncharged with RSA 20.2% and the mutant residue ARG is buried positive-charged with RSA 8.0%                       | The substitution switches the charge (+/-) of the buried residue.                                                                |
| <b>Disallowed phi/psi</b>            | This substitution does not trigger disallowed phi/psi alert. The phi/psi angles are in favoured region for wild-type residue and in allowed region for mutant residue.                                                 | The mutant residue is in outlier region while the wild-type residue is in the favoured or allowed region.                        |
| <b>Buried charge replaced</b>        | This substitution does not replace a buried charged residue with an uncharged residue. The wild-type residue GLY is exposed uncharged with RSA 20.2% and the mutant residue ARG is buried charged with RSA 8.0%.       | The substitution replaces a buried charged residue with an uncharged residue.                                                    |

|                                    |                                                                                                                                                                                                        |                                                                                                                                                                                          |
|------------------------------------|--------------------------------------------------------------------------------------------------------------------------------------------------------------------------------------------------------|------------------------------------------------------------------------------------------------------------------------------------------------------------------------------------------|
| <b>Buried Gly replaced</b>         | This substitution does not replace a buried GLY residue.                                                                                                                                               | The substitution replaces a buried glycine.                                                                                                                                              |
| <b>Buried H-bond breakage</b>      | This substitution does not result in a complete disruption of all side-chain / side-chain H-bond(s) and/or side-chain / main-chain bond(s) bonds, and the wild-type residue is not buried (RSA 20.2%). | The substitution breaks all side-chain / side-chain H-bond(s) and/or side-chain / main-chain H-bond(s) formed by the wild type which was buried. The maximum H-bond N-O length is 3.9 Å. |
| <b>Buried salt bridge breakage</b> | The wild-type residue does not form any salt bridge.                                                                                                                                                   | The substitution breaks a salt bridge formed by wild-type which was buried. The maximum N-O bond length is 5.0 Å.                                                                        |
| <b>Cavity altered</b>              | The substitution leads to the contraction of cavity volume by 145.152 Å <sup>3</sup>                                                                                                                   | The substitution leads to an expansion or contraction of the cavity volume of ≥ 70 Å <sup>3</sup> . Cavity also refers to a pocket on the surface.                                       |
| <b>Buried / exposed switch</b>     | The wild-type residue GLY is exposed (RSA 20.2%) and the mutant residue ARG is buried (RSA 8.0%)                                                                                                       | The substitution results in a change between buried and exposed state of the target variant residue. (RSA < 9% for buried and the difference between RSA has to be at least 5%.)         |
| <b>Cis pro replaced</b>            | Wild-type residue is not a cis proline.                                                                                                                                                                | A cis proline in the wild type is replaced in the mutant.                                                                                                                                |
| <b>Gly in a bend</b>               | This substitution replaces glycine originally located in a bend curvature.                                                                                                                             | The wild-type residue is glycine and is located in a bend curvature (reported 'S' in DSSP).                                                                                              |

**Supplementary Table-5: Detailed analysis of IKK $\alpha$ <sup>G167R</sup> by MutPred2**

| <b>ID</b>                                            | <b>Substitution</b> | <b>MutPred2 score</b> | <b>Remarks</b>     | <b>Affected PROSITE and ELM Motifs</b> |
|------------------------------------------------------|---------------------|-----------------------|--------------------|----------------------------------------|
| IKKA_HUMAN                                           | G167R               | 0.9                   | -                  | ELME000146,<br>ELME000313,<br>PS00007  |
| <b>Molecular mechanisms with P-values &lt;= 0.05</b> |                     |                       | <b>Probability</b> | <b>P-value</b>                         |
| Altered DNA binding                                  |                     |                       | 0.47               | 5.80E-05                               |
| Altered Ordered interface                            |                     |                       | 0.31               | 0.01                                   |
| Altered Metal binding                                |                     |                       | 0.3                | 4.40E-03                               |
| Altered Transmembrane protein                        |                     |                       | 0.27               | 5.40E-04                               |
| Gain of Helix                                        |                     |                       | 0.27               | 0.03                                   |
| Loss of Relative solvent accessibility               |                     |                       | 0.25               | 0.03                                   |
| Gain of Acetylation at K162                          |                     |                       | 0.21               | 0.03                                   |
| Loss of Catalytic site at D165                       |                     |                       | 0.1                | 0.04                                   |

For more information on the probability and statistical analyses performed by the MutPred2 algorithm, readers are referred to the study by Pejaver, V., Urresti, J., Lugo-Martinez, J. et al. Inferring the molecular and phenotypic impact of amino acid variants with MutPred2. Nat Commun 11, 5918 (2020).

**Supplementary Table-6: Detailed analysis of IKK $\alpha$ <sup>G167R</sup> by CUPSAT**

| <b>Amino acid</b> | <b>Overall Stability</b> | <b>Torsion</b> | <b>Predicted <math>\Delta\Delta G</math><br/>(kcal/mol)</b> |
|-------------------|--------------------------|----------------|-------------------------------------------------------------|
| ALA               | Destabilising            | Favourable     | -0.45                                                       |
| VAL               | Destabilising            | Unfavourable   | -0.82                                                       |
| LEU               | Stabilising              | Unfavourable   | 0.34                                                        |
| ILE               | Destabilising            | Unfavourable   | -1.76                                                       |
| MET               | Destabilising            | Unfavourable   | -2.17                                                       |
| PRO               | Stabilising              | Favourable     | 0.24                                                        |
| TRP               | Destabilising            | Unfavourable   | -1.56                                                       |
| SER               | Stabilising              | Favourable     | 0.23                                                        |
| THR               | Destabilising            | Unfavourable   | -0.88                                                       |
| PHE               | Destabilising            | Unfavourable   | -0.29                                                       |
| GLN               | Destabilising            | Favourable     | -0.68                                                       |
| LYS               | Destabilising            | Favourable     | -1.12                                                       |
| TYR               | Destabilising            | Unfavourable   | -2.02                                                       |
| ASN               | Destabilising            | Favourable     | -1.05                                                       |
| CYS               | Destabilising            | Unfavourable   | -2.12                                                       |
| GLU               | Destabilising            | Favourable     | -0.62                                                       |
| ASP               | Destabilising            | Favourable     | -0.77                                                       |
| ARG               | Destabilising            | Favourable     | -0.83                                                       |
| HIS               | Stabilising              | Favourable     | 0.99                                                        |

**Supplementary Table-7: Primer sequences used in this study.**

| <b>Gene</b>                                      | <b>Assay</b> | <b>Forward primer</b> | <b>Reverse primer</b>   |
|--------------------------------------------------|--------------|-----------------------|-------------------------|
| <i>CHUK</i><br>( <i>IKK<math>\alpha</math></i> ) | PCR          | AGTGACGCATTCATTCTCGC  | ACGCACTGTCACACTCACTA    |
| <i>CHUK</i><br>( <i>IKK<math>\alpha</math></i> ) | qRT-PCR      | CCTCAAGATGGGGAGACTTC  | ACTCATTCTGTTAACCAACTCCA |
| <i>IRF4</i>                                      | qRT-PCR      | TCCGAGAAGGCATCGACAAG  | AGGCGTTGTCATGGTGTAGG    |
| <i>PAX5</i>                                      | qRT-PCR      | TATCCGACTCCTCGGACCAG  | GTTCCACTATCCTCTGGCGG    |
| <i>IKZF1</i>                                     | qRT-PCR      | TGGCAGGGCAGAGGGAG     | GCATCCATGGTCCTCAGGTT    |
| <i>GAPDH</i>                                     | qRT-PCR      | CGACCACTTTGTCAAGCTCA  | GAGGGTCTCTCTCTCCTCT     |
| <i>CCR6</i>                                      | qRT-PCR      | AGCACACCACCCAGTGTATG  | CGTGGGCCCTCTCTTACTGA    |
| <i>KLRG1</i>                                     | qRT-PCR      | TAGCTTTGTGCAGACATGCG  | TGCAAAGGGACACTTCTTACAC  |
| <i>GPR15</i>                                     | qRT-PCR      | TTGCATTTCAAACCCGGCAG  | CCGTCCTCCACAGTCCTAGA    |
| <i>KLRB1</i>                                     | qRT-PCR      | CTCTGTCTGCCATGGACCAA  | GAACCCTGACAGACATCCCG    |
| <i>GZMK</i>                                      | qRT-PCR      | CTCCATCCAGTATGGCGGAC  | GTGTGCGCCTAAAACCACAG    |
| <i>NR4A1</i>                                     | qRT-PCR      | CATTGTTGCCAAGACCTGCC  | ATCTAGCCTCACAGGAGGGG    |

**Supplementary Table-8: Antibodies used in this study.**

| Antibody name                                   | Cat number       | Company     | Assay                            | Conjugate | Dilution |
|-------------------------------------------------|------------------|-------------|----------------------------------|-----------|----------|
| IKK $\alpha$                                    | A19694           | ABclonal    | Western blotting<br>(Cell lines) | -         | 1:1000   |
| IKK $\alpha$                                    | 621401           | BioLegend   | Western blotting<br>(PBMCs)      | -         | 1:1000   |
| NIK                                             | 4994             | CST         | Western blotting                 | -         | 1:1000   |
| NF- $\kappa$ B2<br>p100/p52                     | 695902           | BioLegend   | Western blotting                 | -         | 1:1000   |
| Phospho-NF- $\kappa$ B2<br>p100<br>(Ser866/870) | 4810             | CST         | Western blotting                 | -         | 1:1000   |
| FLAG                                            | F9291            | Sigma       | Western blotting                 | -         | 1:3000   |
| $\beta$ -Actin                                  | 4970             | CST         | Western blotting                 | -         | 1:3000   |
| GAPDH                                           | 2118             | CST         | Western blotting                 |           | 1:3000   |
| $\alpha$ -Tubulin                               | ab7291           | Abcam       | Western blotting                 |           | 1:3000   |
| CD19                                            | 363010           | BioLegend   | Flow cytometry                   | APC-Cy7   | 1:100    |
| CD27                                            | 356410           | BioLegend   | Flow cytometry                   | APC       | 1:100    |
| IgD                                             | 348225           | BioLegend   | Flow cytometry                   | BV421     | 1:100    |
| IgM                                             | 314506           | BioLegend   | Flow cytometry                   | FITC      | 1:100    |
| CD38                                            | 356606           | BioLegend   | Flow cytometry                   | APC       | 1:100    |
| CD21                                            | 354908           | BioLegend   | Flow cytometry                   | PerCP     | 1:100    |
| CD3                                             | 317318<br>317308 | BioLegend   | Flow cytometry                   | APC, PE   | 1:100    |
| CD8                                             | 345774           | BD          | Flow cytometry                   | PerCP     | 1:50     |
| CD4                                             | 300546           | BioLegend   | Flow cytometry                   | BV510     | 1:100    |
| CD8                                             | 344748           | BioLegend   | Flow cytometry                   | BV421     | 1:100    |
| CD56                                            | 362508           | BioLegend   | Flow cytometry                   | PE        | 1:100    |
| CD161                                           | 339926           | BioLegend   | Flow cytometry                   | PB        | 1:100    |
| TCRV $\alpha$ 7.2                               | 351728           | BioLegend   | Flow cytometry                   | AF700     | 1:100    |
| CD25                                            | 302604           | BioLegend   | Flow cytometry                   | FITC      | 1:100    |
| FOXP3                                           | 320108           | BioLegend   | Flow cytometry                   | PE        | 1:100    |
| CXCR5                                           | 356914           | BioLegend   | Flow cytometry                   | FITC      | 1:100    |
| CD31                                            | 303106           | BioLegend   | Flow cytometry                   | PE        | 1:100    |
| CD16                                            | 360706           | BioLegend   | Flow cytometry                   | APC       | 1:100    |
| CD16                                            | 302017           | BioLegend   | Flow cytometry                   | APC-Cy7   | 1:100    |
| ICOSL                                           | 309403           | BioLegend   | Flow cytometry                   | PE        | 1:100    |
| CD69                                            | 310906           | BioLegend   | Flow cytometry                   | PE        | 1:100    |
| CD45RA                                          | 304112           | BioLegend   | Flow cytometry                   | APC       | 1:100    |
| IFN- $\gamma$                                   | 69007            | Proteintech | Flow cytometry                   | CL488     | 1:100    |
| ICOS                                            | 313508           | BioLegend   | Flow cytometry                   | PE        | 1:100    |
