# Supplementary material for: Defective kinase activity of IKKα leads to combined immunodeficiency and disruption of immune tolerance in humans
Source: PubMed Central journal article supplement — Nat Commun. 2024 Nov 16;15:9944. doi: 10.1038/s41467-024-54345-4 (PMC11569180; doi:10.1038/s41467-024-54345-4), 2024-11-16
Supplement: 41467_2024_54345_MOESM2_ESM.pdf [file 41467_2024_54345_MOESM2_ESM.pdf]

## **Description of Additional Supplementary Files**

File Name: Data S1

Description: Counts per million (CPM) values of genes detected in our bulk RNA-seq analyses and the list of differentially expressed genes (DEG).
